# Supplementary material for: Several Policy Issues Related to Inorganic (Mineral) Fertilizer in China
Source: MDPI journal article supplement (doi:10.3390/ijerph19010321), 1997-01-01
Supplement: s1 [file s1]

# **A Multiscale Land Use Regression Approach for Estimating Intraurban Spatial Variability of PM<sub>2.5</sub> Concentration by Integrating Multisource Datasets**

**Yuan Shi <sup>1,\*</sup>, Alexis Kai-Hon Lau <sup>2,3,4</sup>, Edward Ng <sup>1,5,6</sup>, Hung Chak Ho <sup>7</sup>, and Muhammad Bilal <sup>8</sup>**

<sup>1</sup> Institute of Future Cities (IOFC), The Chinese University of Hong Kong, Hong Kong, China

<sup>2</sup> Division of Environment and Sustainability, Hong Kong University of Science and Technology, Clear Water Bay, Kowloon, Hong Kong, China; alau@ust.hk (A.K.-H.L.)

<sup>3</sup> Department of Civil and Environmental Engineering, The Hong Kong University of Science and Technology, Clear Water Bay, Kowloon, Hong Kong, China;

<sup>4</sup> Institute for the Environment, The Hong Kong University of Science & Technology, Clear Water Bay, Kowloon, Hong Kong, China

<sup>5</sup> School of Architecture, The Chinese University of Hong Kong, Hong Kong, China; edwardng@cuhk.edu.hk (E.N.)

<sup>6</sup> Institute of Environment, Energy and Sustainability (IEES), The Chinese University of Hong Kong, Hong Kong, China

<sup>7</sup> Department of Urban Planning and Design, The University of Hong Kong, Hong Kong, China; hcho21@hku.hk (H.C.H)

<sup>8</sup> Lab of Environmental Remote Sensing (LERS), School of Marine Sciences, Nanjing University of Information Science and Technology, Nanjing 210044, China; muhammad.bilal@connect.polyu.hk (M.B.)

\* Correspondence: shiyuan@link.cuhk.edu.hk

---

This document contains supplementary material related to the research article titled “A multiscale land use regression approach for estimating intraurban spatial variability of PM<sub>2.5</sub> concentration by integrating multi-source datasets”.

**Table S1.** Detailed information of the 16 stations in the air quality monitoring network in Hong Kong.

| Region of the Station | Latitude (degree) | Longitude (degree) | Station Types | Zoning in City Plan | Sampling Height Above Ground (m) | Building Height Average (m) | Building Coverage Ratio (%) | Sky View Factor | Green Space Coverage Ratio (%) | Road Area Ratio (%) | Road Network Density (km/km <sup>2</sup> ) | Residential Land Use (%) | Commercial Land Use (%) | Governmental and Institutional Land Use (%) | Industrial Land Use (%) | Urban Open Space Percentage (%) |
|-----------------------|-------------------|--------------------|---------------|---------------------|----------------------------------|-----------------------------|-----------------------------|-----------------|--------------------------------|---------------------|--------------------------------------------|--------------------------|-------------------------|---------------------------------------------|-------------------------|---------------------------------|
| CAUSEWAY BAY          | 22.2801           | 114.1851           | Roadside      | Urban Roadside      | 3                                | 46.9                        | 30.6                        | 0.26            | 24.0                           | 25.6                | 17.2                                       | 18.4                     | 12.9                    | 11.9                                        | 0.0                     | 20.5                            |
| CENTRAL               | 22.2818           | 114.1581           | Roadside      | Urban Roadside      | 4.5                              | 61.0                        | 36.2                        | 0.19            | 10.3                           | 25.2                | 11.6                                       | 3.8                      | 29.9                    | 15.8                                        | 0.1                     | 7.8                             |
| CENTRAL/WESTERN       | 22.2849           | 114.1444           | General       | Urban               | 16                               | 32.8                        | 38.3                        | 0.86            | 12.3                           | 25.5                | 9.7                                        | 39.1                     | 4.7                     | 12.7                                        | 0.1                     | 13.1                            |
| EASTERN               | 22.2829           | 114.2194           | General       | Urban               | 15                               | 39.2                        | 26.2                        | 0.71            | 19.6                           | 19.9                | 13.3                                       | 37.4                     | 3.6                     | 10.0                                        | 0.4                     | 20.8                            |
| KWAI CHUNG            | 22.3571           | 114.1296           | General       | Urban               | 13                               | 35.5                        | 24.1                        | 0.80            | 25.0                           | 20.6                | 10.1                                       | 21.8                     | 2.2                     | 7.6                                         | 7.2                     | 27.1                            |
| KWUN TONG             | 22.3096           | 114.2312           | General       | Urban               | 14.7                             | 36.7                        | 26.6                        | 0.88            | 18.6                           | 21.0                | 13.7                                       | 33.6                     | 1.6                     | 14.1                                        | 5.1                     | 19.1                            |
| MONG KOK              | 22.3226           | 114.1683           | Roadside      | Urban Roadside      | 3                                | 33.3                        | 40.1                        | 0.22            | 4.3                            | 36.1                | 12.3                                       | 28.3                     | 8.6                     | 11.1                                        | 2.4                     | 4.7                             |
| NORTH                 | 22.4967           | 114.1282           | General       | New Town            | 23                               | 27.7                        | 12.2                        | 0.87            | 14.7                           | 21.4                | 9.5                                        | 25.5                     | 0.0                     | 17.9                                        | 0.3                     | 13.3                            |
| SHA TIN               | 22.3763           | 114.1845           | General       | New Town            | 25                               | 20.2                        | 12.6                        | 0.08            | 31.3                           | 18.5                | 9.2                                        | 17.3                     | 0.2                     | 10.8                                        | 3.6                     | 31.3                            |
| SHAM SHUI PO          | 22.3302           | 114.1591           | General       | Urban               | 17                               | 28.6                        | 32.2                        | 0.22            | 8.0                            | 28.1                | 11.0                                       | 40.6                     | 1.5                     | 7.5                                         | 1.2                     | 7.9                             |
| SOUTHERN              | 22.2475           | 114.1601           | General       | Urban               | 18                               | 30.0                        | 14.2                        | 0.88            | 30.4                           | 12.3                | 6.0                                        | 8.4                      | 0.5                     | 13.3                                        | 4.5                     | 30.6                            |
| TAI PO                | 22.4510           | 114.1646           | General       | New Town            | 28                               | 24.8                        | 25.6                        | 0.95            | 18.0                           | 17.6                | 6.3                                        | 38.3                     | 0.9                     | 11.4                                        | 0.0                     | 17.2                            |
| TAP MUN               | 22.4713           | 114.3607           | General       | Rural               | 11                               | 5.2                         | 0.9                         | 0.45            | 61.8                           | 0.0                 | 0.0                                        | 4.0                      | 0.0                     | 0.4                                         | 0.0                     | 65.6                            |
| TSEUNG KWAN O         | 22.3176           | 114.2596           | General       | Urban               | 16                               | 34.9                        | 14.2                        | 0.87            | 21.8                           | 20.2                | 11.9                                       | 21.9                     | 0.0                     | 18.1                                        | 0.3                     | 19.6                            |
| TSUEN WAN             | 22.3717           | 114.1145           | General       | Urban               | 17                               | 36.4                        | 32.6                        | 0.85            | 6.5                            | 24.1                | 9.5                                        | 24.4                     | 3.9                     | 8.1                                         | 3.9                     | 6.5                             |
| TUEN MUN              | 22.3911           | 113.9767           | General       | New Town            | 27                               | 24.9                        | 16.6                        | 0.85            | 26.9                           | 20.2                | 11.1                                       | 33.5                     | 0.7                     | 12.0                                        | 0.2                     | 26.4                            |
| TUNG CHUNG            | 22.2889           | 113.9437           | General       | New Town            | 27.5                             | 36.6                        | 11.9                        | 0.90            | 29.6                           | 20.9                | 8.9                                        | 28.8                     | 4.3                     | 4.1                                         | 0.0                     | 24.6                            |
| YUEN LONG             | 22.4452           | 114.0226           | General       | New Town            | 25                               | 19.3                        | 22.7                        | 0.97            | 20.7                           | 19.1                | 7.4                                        | 35.8                     | 0.9                     | 12.9                                        | 0.2                     | 17.7                            |

**Table S2.** The ten study sites that selected for the PM<sub>2.5</sub> sampling at neighborhood scale.

| <i>Selected site</i> | <i>Site No.</i> | <i>Abbr. of site names</i> | <i>Location<sup>1</sup> and terrain features</i> | <i>Function</i>                           | <i>Building density and morphology</i> | <i>Road network layout<sup>2</sup></i>                             | <i>Air quality monitoring<sup>3</sup></i> | <i>Measurement date (YYYYMMDD)</i> |
|----------------------|-----------------|----------------------------|--------------------------------------------------|-------------------------------------------|----------------------------------------|--------------------------------------------------------------------|-------------------------------------------|------------------------------------|
| <i>Central</i>       | 1               | CEN                        | HKI, Coastal, Slight slope                       | Commercial                                | Compact high-rise                      | Irregular road network, express and trunk roads included.          | Roadside                                  | 20190523                           |
| <i>Causeway Bay</i>  | 2               | CSB                        | HKI, Coastal, Flat terrain                       | Commercial                                | Compact high-rise                      | Irregular road network, express and trunk roads included.          | Roadside                                  | 20180618<br>20180711               |
| <i>North Point</i>   | 3               | NP                         | HKI, Coastal, Flat terrain                       | Governmental, Residential                 | Compact high-rise                      | Irregular road network, express and trunk roads included.          | n.a.                                      | 20180612                           |
| <i>Tsim Sha Tsui</i> | 4               | TST                        | KL, Coastal, Flat terrain                        | Commercial, Residential, Sightseeing      | Compact high-rise                      | Irregular road network, mainly primary and ordinary roads.         | n.a.                                      | 20180517<br>20180722               |
| <i>Yau Ma Tei</i>    | 5               | YMT                        | KL, Flat terrain                                 | Largely residential, partially commercial | Compact high-rise                      | Orthogonal grid road network, mainly primary and ordinary roads.   | n.a.                                      | 20180915                           |
| <i>Mong Kok</i>      | 6               | MK                         | KL, Flat terrain                                 | Commercial, Residential, Sightseeing      | Compact high-rise                      | Orthogonal grid road network, mainly primary and ordinary roads.   | Roadside                                  | 20180518<br>20180725               |
| <i>Sham Shui Po</i>  | 7               | SSP                        | KL, Flat terrain                                 | Largely residential                       | Compact high-rise                      | Orthogonal grid road network, mainly primary and ordinary roads.   | General                                   | 20190513                           |
| <i>Shek Kip Mei</i>  | 8               | SKM                        | KL, Flat terrain                                 | Residential                               | Open-mid rise                          | Sparse road network layout, mainly ordinary roads.                 | n.a.                                      | 20190512                           |
| <i>Kwun Tong</i>     | 9               | KTG                        | KL, Flat terrain                                 | Industrial                                | Compact high-rise                      | Orthogonal grid road network, mainly secondary and ordinary roads. | General                                   | 20180603                           |
| <i>Sha Tin</i>       | 10              | SHA                        | NT, Flat terrain                                 | Residential, Open space                   | Open-high rise, Open-mid rise          | Relatively sparse road network layout, mainly ordinary roads.      | General                                   | 20180929                           |

Note<sup>1</sup>: HKI – Hong Kong Island; KL – Kowloon; NT – New Territories.

Note<sup>2</sup>: Description of the road classes is based on OpenStreetMap (OSM).

Note<sup>3</sup>: Two types of long-term air quality monitoring stations of HKEPD – general station and roadside station.

**Table S3.** List of all atmospheric soundings indices examined in the stepwise regression modelling of this study (based on <http://weather.uwyo.edu/upperair/indices.html>).

| <i>Atmospheric soundings index</i>                    | <i>Unit</i> | <i>Abbr.</i> |
|-------------------------------------------------------|-------------|--------------|
| <i>Bulk Richardson Number</i>                         | -           | <i>BRCH</i>  |
| <i>Bulk Richardson Number using CAPV</i>              | -           | <i>BRCV</i>  |
| <i>Convective Available Potential Energy</i>          | <i>J/kg</i> | <i>CAPE</i>  |
| <i>CAPE using virtual temperature</i>                 | <i>J/kg</i> | <i>CAPV</i>  |
| <i>Convective Inhibition</i>                          | <i>J/kg</i> | <i>CINS</i>  |
| <i>CINS using virtual temperature</i>                 | <i>J/kg</i> | <i>CINV</i>  |
| <i>Cross totals index</i>                             | -           | <i>CTOT</i>  |
| <i>K index</i>                                        | -           | <i>KINX</i>  |
| <i>Pressure of the Lifted Condensation Level</i>      | <i>hPa</i>  | <i>LCLP</i>  |
| <i>Temperature of the Lifted Condensation Level</i>   | <i>K</i>    | <i>LCLT</i>  |
| <i>Level of Free Convection</i>                       | <i>hPa</i>  | <i>LFCT</i>  |
| <i>LFCT computed by using the virtual temperature</i> | <i>hPa</i>  | <i>LF CV</i> |
| <i>Lifted index</i>                                   | -           | <i>LIFT</i>  |
| <i>LIFT computed using virtual temperature</i>        | -           | <i>LIFV</i>  |
| <i>Mean mixed layer mixing ratio</i>                  | <i>g/kg</i> | <i>MLMR</i>  |
| <i>Mean mixed layer potential temperature</i>         | <i>K</i>    | <i>MLPT</i>  |
| <i>Total precipitable water</i>                       | <i>mm</i>   | <i>PWAT</i>  |
| <i>Showalter index</i>                                | -           | <i>SHOW</i>  |
| <i>SWEAT index</i>                                    | -           | <i>SWET</i>  |
| <i>Total totals index</i>                             | -           | <i>TTOT</i>  |
| <i>Vertical totals index</i>                          | -           | <i>VTOT</i>  |

**Table S4.** Summary of coefficients of the four seasonal GTWR models. The model structures are shown in Table 2 of main text.

|                          | <i>Mean</i> | <i>Min</i> | <i>Quantiles</i><br><i>10%</i> | <i>Quantiles</i><br><i>25%</i> | <i>Median</i> | <i>Quantiles</i><br><i>75%</i> | <i>Quantiles</i><br><i>90%</i> | <i>Max</i> |
|--------------------------|-------------|------------|--------------------------------|--------------------------------|---------------|--------------------------------|--------------------------------|------------|
| <i>Spring GTWR model</i> |             |            |                                |                                |               |                                |                                |            |
| <i>Intercept</i>         | 3.287E+03   | 2.340E+03  | 2.418E+03                      | 3.136E+03                      | 3.348E+03     | 3.613E+03                      | 3.704E+03                      | 3.716E+03  |
| <i>AOD</i>               | 2.603E+01   | 1.776E+01  | 1.826E+01                      | 2.298E+01                      | 2.622E+01     | 3.035E+01                      | 3.062E+01                      | 3.067E+01  |
| <i>LONG</i>              | -2.887E+01  | -3.318E+01 | -3.307E+01                     | -3.231E+01                     | -2.994E+01    | -2.700E+01                     | -2.066E+01                     | -1.997E+01 |
| <i>KINX</i>              | 7.302E-01   | -1.244E+00 | -1.241E+00                     | -1.230E+00                     | 1.564E+00     | 2.541E+00                      | 2.585E+00                      | 2.634E+00  |
| <i>PWAT</i>              | -5.916E-01  | -9.225E-01 | -9.101E-01                     | -8.974E-01                     | -6.048E-01    | -3.053E-01                     | -2.378E-01                     | -2.320E-01 |
| <i>Summer GTWR model</i> |             |            |                                |                                |               |                                |                                |            |
| <i>Intercept</i>         | -1.440E+03  | -1.550E+03 | -1.549E+03                     | -1.549E+03                     | -1.548E+03    | -1.280E+03                     | -1.279E+03                     | -1.278E+03 |
| <i>AOD</i>               | 4.478E+01   | 4.473E+01  | 4.473E+01                      | 4.473E+01                      | 4.474E+01     | 4.483E+01                      | 4.484E+01                      | 4.487E+01  |
| <i>FAI250</i>            | 1.295E+01   | 1.072E+01  | 1.075E+01                      | 1.079E+01                      | 1.439E+01     | 1.440E+01                      | 1.440E+01                      | 1.440E+01  |
| <i>LAT</i>               | 6.606E+01   | 5.878E+01  | 5.881E+01                      | 5.884E+01                      | 7.090E+01     | 7.096E+01                      | 7.099E+01                      | 7.100E+01  |
| <i>KINX</i>              | -3.978E-01  | -4.110E-01 | -4.108E-01                     | -4.108E-01                     | -4.106E-01    | -3.782E-01                     | -3.775E-01                     | -3.771E-01 |
| <i>PWAT</i>              | -5.201E-01  | -5.382E-01 | -5.382E-01                     | -5.381E-01                     | -5.377E-01    | -4.932E-01                     | -4.926E-01                     | -4.922E-01 |
| <i>Fall GTWR model</i>   |             |            |                                |                                |               |                                |                                |            |
| <i>Intercept</i>         | 1.028E+01   | -2.027E+01 | -1.627E+01                     | -2.290E+00                     | 8.182E+00     | 2.191E+01                      | 4.328E+01                      | 4.882E+01  |
| <i>AOD</i>               | 1.429E+01   | -1.528E+01 | -2.984E+00                     | -3.052E-02                     | 1.357E+01     | 3.359E+01                      | 3.753E+01                      | 4.877E+01  |
| <i>RES500</i>            | 1.403E-05   | -5.305E-06 | 1.112E-06                      | 1.290E-05                      | 1.554E-05     | 1.768E-05                      | 2.069E-05                      | 2.716E-05  |
| <i>BUS400</i>            | 1.041E-01   | 5.386E-02  | 6.076E-02                      | 9.442E-02                      | 1.013E-01     | 1.271E-01                      | 1.527E-01                      | 1.588E-01  |
| <i>TEMP</i>              | 5.942E-01   | -1.467E+00 | -1.219E+00                     | 2.771E-01                      | 8.852E-01     | 1.360E+00                      | 1.563E+00                      | 1.826E+00  |
| <i>WSPD</i>              | -2.034E-01  | -5.954E-01 | -4.188E-01                     | -3.255E-01                     | -2.517E-01    | -3.273E-02                     | 7.078E-02                      | 2.256E-01  |
| <i>KINX</i>              | 8.586E-02   | -2.964E-01 | -1.007E-01                     | -4.968E-02                     | 1.078E-01     | 2.178E-01                      | 2.906E-01                      | 3.580E-01  |
| <i>PWAT</i>              | -2.577E-01  | -7.563E-01 | -4.728E-01                     | -3.305E-01                     | -2.283E-01    | -1.140E-01                     | -6.709E-02                     | -2.388E-02 |
| <i>Winter GTWR model</i> |             |            |                                |                                |               |                                |                                |            |
| <i>Intercept</i>         | 2.817E+03   | 1.213E+03  | 1.657E+03                      | 1.887E+03                      | 2.241E+03     | 3.149E+03                      | 5.697E+03                      | 5.884E+03  |
| <i>AOD</i>               | 3.217E+01   | 7.441E+00  | 8.972E+00                      | 2.220E+01                      | 2.897E+01     | 4.000E+01                      | 6.236E+01                      | 6.673E+01  |
| <i>LONG</i>              | -2.771E+01  | -5.429E+01 | -5.267E+01                     | -3.322E+01                     | -2.200E+01    | -1.929E+01                     | -1.504E+01                     | -1.460E+01 |
| <i>ROUGHN</i>            | 6.455E-01   | 4.503E-01  | 4.714E-01                      | 5.313E-01                      | 6.610E-01     | 6.831E-01                      | 8.153E-01                      | 9.583E-01  |
| <i>ESS50</i>             |             |            |                                |                                |               |                                |                                |            |
| <i>CINV</i>              | 7.719E-02   | -2.221E-01 | -2.057E-01                     | -1.040E-01                     | 1.356E-01     | 2.951E-01                      | 3.133E-01                      | 3.236E-01  |
| <i>LCLP</i>              | 2.660E-01   | -5.502E-02 | -3.212E-02                     | 1.707E-01                      | 3.612E-01     | 3.695E-01                      | 4.140E-01                      | 4.831E-01  |
| <i>LFCV</i>              | 7.391E-02   | -8.213E-03 | -4.424E-03                     | 6.789E-03                      | 8.073E-02     | 1.437E-01                      | 1.575E-01                      | 1.704E-01  |
| <i>VTOT</i>              | 2.454E+00   | -3.084E+00 | -2.864E+00                     | -2.850E+00                     | 4.024E+00     | 5.029E+00                      | 6.327E+00                      | 7.163E+00  |

**Table S5.** The numerical range and summary statistics of input predictor variables of the neighborhood scale LUR model.

|                                   | <i>Min</i> | <i>Quantiles<br/>10</i> | <i>Quantiles<br/>25</i> | <i>Mean</i> | <i>Quantiles<br/>50</i> | <i>Quantiles<br/>90</i> | <i>Max</i> | <i>Range</i> |
|-----------------------------------|------------|-------------------------|-------------------------|-------------|-------------------------|-------------------------|------------|--------------|
| <i>Normalized<br/>betweenness</i> | 0.000E+00  | 0.000E+00               | 2.759E-05               | 1.320E-03   | 2.739E-04               | 2.946E-03               | 2.863E-02  | 2.863E-02    |
| <i>Normalized<br/>closeness</i>   | 6.501E-05  | 6.651E-05               | 6.842E-05               | 7.555E-05   | 7.791E-05               | 8.418E-05               | 8.470E-05  | 1.969E-05    |
| <i>Control<br/>value</i>          | 1.667E-01  | 8.174E-01               | 1.959E+00               | 5.587E+00   | 3.236E+00               | 1.334E+01               | 2.083E+01  | 2.067E+01    |
| <i>Global<br/>integration</i>     | 1.045E+00  | 1.660E+00               | 1.876E+00               | 2.128E+00   | 2.039E+00               | 2.579E+00               | 3.137E+00  | 2.093E+00    |
| <i>Sky view<br/>factor</i>        | 1.814E-03  | 1.140E-01               | 1.741E-01               | 2.943E-01   | 2.547E-01               | 5.527E-01               | 8.623E-01  | 8.605E-01    |
| <i>Point-based<br/>FAI</i>        | 1.069E-01  | 4.158E-01               | 7.531E-01               | 8.990E-01   | 9.245E-01               | 1.261E+00               | 1.974E+00  | 1.867E+00    |

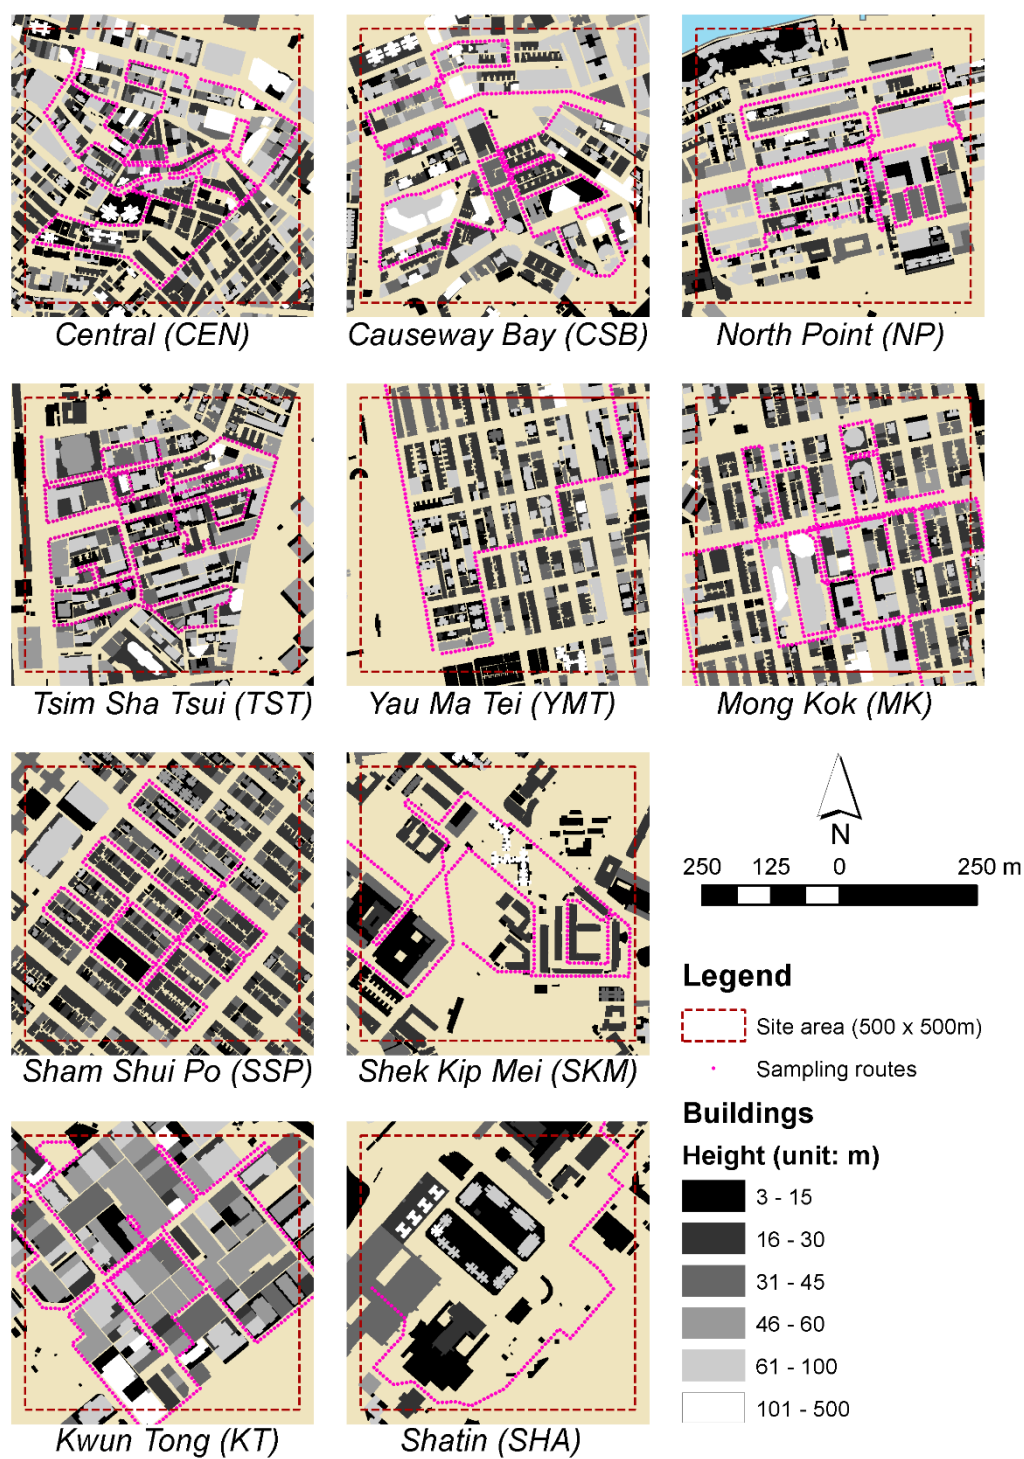

**Figure S1.** The maps and sampling routes in the ten study sites.
